# Supplementary material for: An ESIPT-based colorimetric and fluorescent probe with large Stokes shift for the sensitive detection of hypochlorous acid and its bioimaging in cells
Source: Royal Society of Chemistry journal article supplement (doi:10.1039/d0nj05807f), 2021-01-01

## Electronic Supplementary Information

### **An ESIPT-based colorimetric and fluorescent probe with large Stokes shift for sensitive detection of hypochlorous acid and its bioimaging in cells**

Haixian Ren,<sup>a,b</sup> Fangjun Huo,<sup>c</sup> Caixia Yin<sup>a,b\*</sup>

<sup>a</sup> *Department of Chemistry, Xinzhou Teachers University, Xinzhou 034000, China. Key*

<sup>b</sup> *Laboratory of Chemical Biology and Molecular Engineering of Ministry of Education, Institute of Molecular Science, Shanxi University, Taiyuan 030006, China*

<sup>c</sup> *Research Institute of Applied Chemistry, Shanxi University, Taiyuan 030006, China*

*\*Corresponding author: C.X. Yin, E-mail: [yincx@sxu.edu.cn](mailto:yincx@sxu.edu.cn), Tel/Fax: +86-351-7011022.*

#### **Contents:**

#### **I: Material and Methods**

#### **II:**

**Figure S1:** <sup>1</sup>H MNR (600 MHz) spectrum, <sup>13</sup>C MNR (150 MHz) and HR-MS spectrum of **JBD** in CDCl<sub>3</sub>.

**Figure S2:** Fluorescence intensity of **JBD** (10 mM) at the presence of 400 mM different analytes in PBS/CH<sub>3</sub>CN system (pH=7.4),  $\lambda_{\text{ex}} = 400$  nm.

**Figure S3:** The HR-MS of the **JBD-HClO** system.

**Figure S4:** Cell viability estimated by MTT-8 assay with Hela cells, which were cultured in the presence of 0-50.0  $\mu$ M **JBD** for 12 h and 24 h.

## **I: Material and Methods**

### *Materials and Physical measurements*

All the reagents and solvents were commercially available. Naphthalene-1,6-diol and ethyl acetoacetate were got from Aladdin Industrial Corporation (Shanghai, China). Amino acids were got from Shanghai Experiment Reagent Co., Ltd (Shanghai, China). Fluorescence spectra were recorded by HITACHI F-7000 fluorescence spectrophotometer. Ultraviolet-visible spectra were detected by Hitachi U-3900 UV spectrophotometer.  $^1\text{H}$  NMR and  $^{13}\text{C}$  NMR data were obtained by Bruker AVANCE-600 MHz NMR spectrometers (Bruker, Billerica, MA). HR-MS determinations were implemented on an AB SCIEX Tripple TOF5600 Instruments. Nikon Ti-S microsystem was used to evaluate the response of probe **JBD** to HClO in Hela cells.

Figure S1

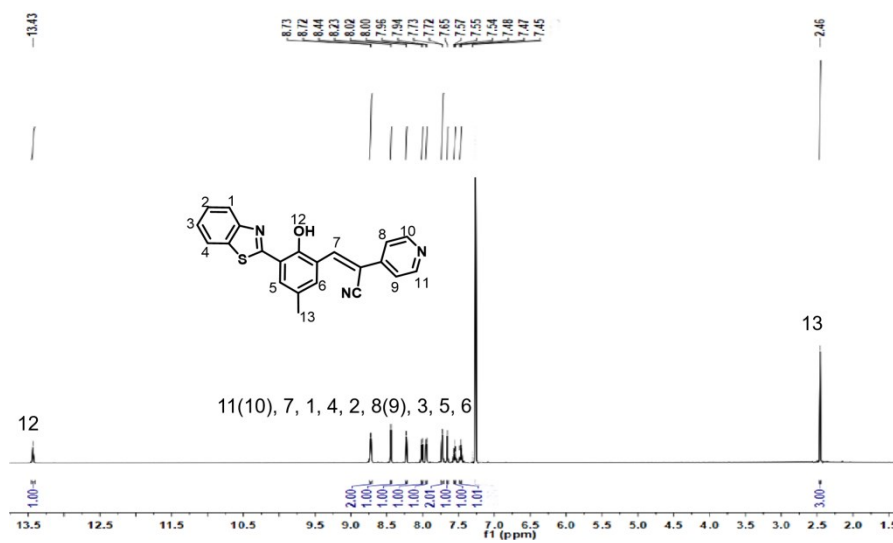

$^1\text{H-NMR}$  of the probe **JBD**

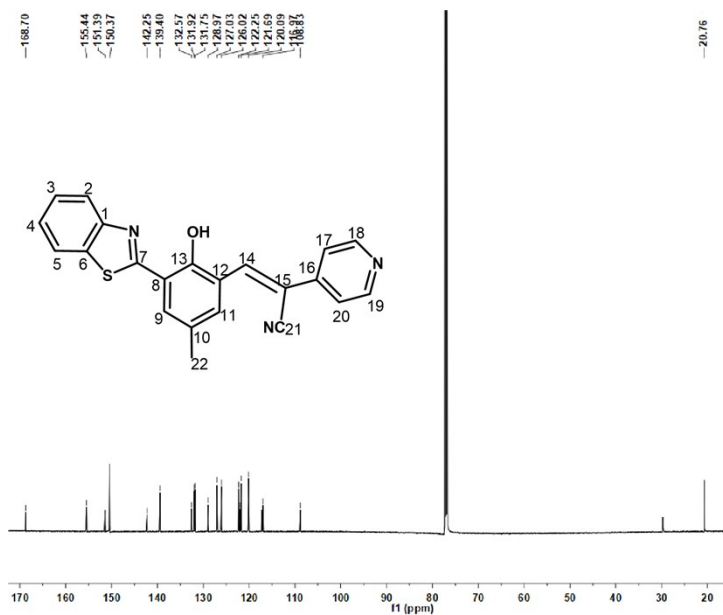

$^{13}\text{C-NMR}$  of the probe **JBD**

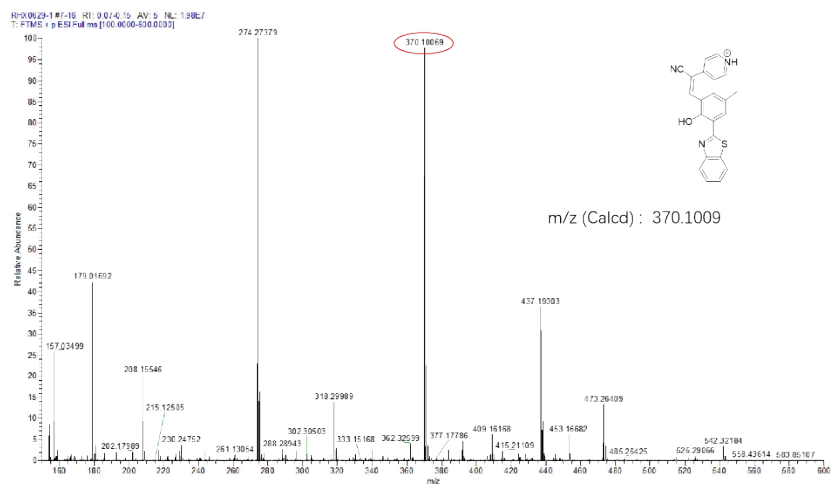

HR-MS of the probe **JBD**

Figure S2

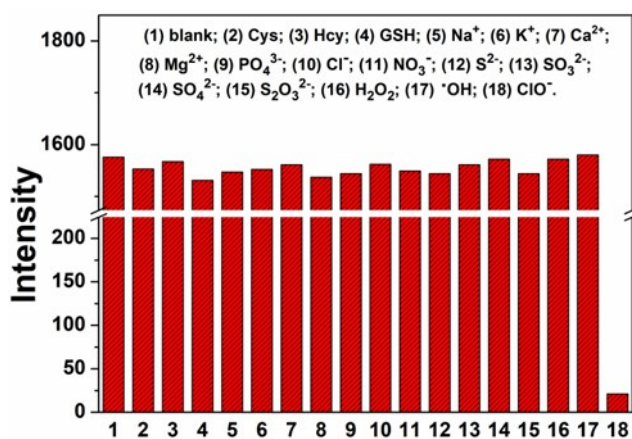

Figure S3

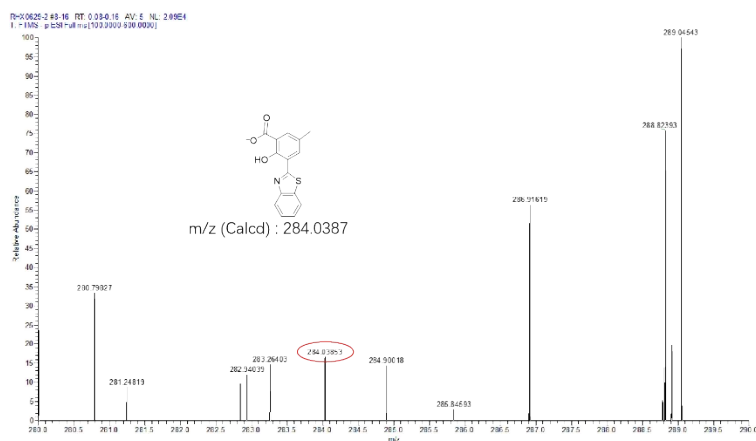

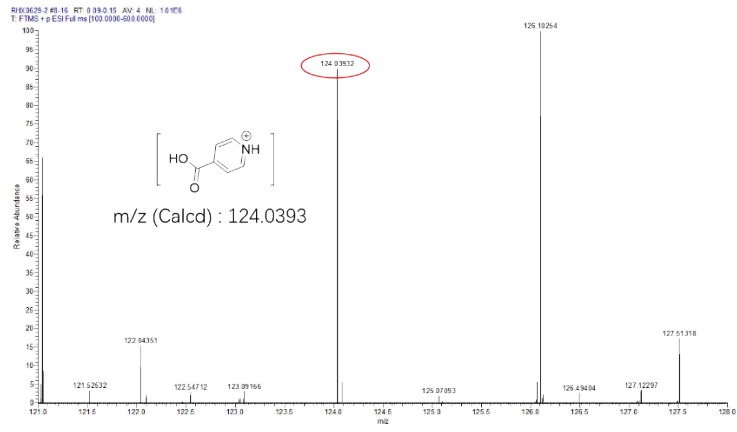

Figure S4

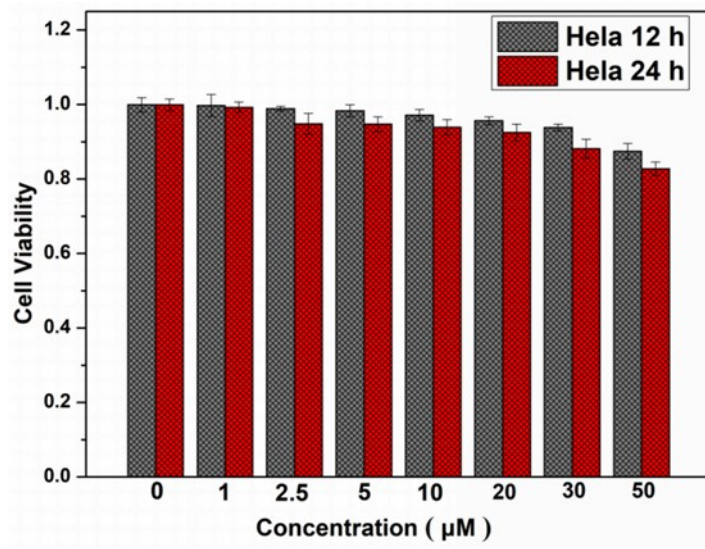

Supplement: d0nj05807f1.pdf [file d0nj05807f1.pdf]
